# Supplementary material for: Practice and outcomes of neonatal resuscitation for newborns with birth asphyxia at Kakamega County General Hospital, Kenya: a direct observation study
Source: Springer Nature journal article supplement (doi:10.1186/s12887-018-1127-6), 2018-05-15
Supplement: MOESM1 [file 15765364]

**STRUCTURED OBSERVATIONAL CHECKLIST**

**SECTION A: HEALTHCARE PROVIDER BACKGROUND (THIS SECTION REFERS TO THE HEALTHCARE PROVIDER WHO PERFORMED THE NEWBORN RESUSCITATION).**

*(Please respond by ticking in the box next to the answer most suitable for you)*

PARTICIPANT CODE: \_\_\_\_\_

DATE: \_\_\_\_\_

**BIODATA**

1. YOUR AGE (YEARS): \_\_\_\_\_

2. GENDER:

|      |                          |        |                          |
|------|--------------------------|--------|--------------------------|
| MALE | <input type="checkbox"/> | FEMALE | <input type="checkbox"/> |
|------|--------------------------|--------|--------------------------|

**TRAINING AND QUALIFICATION**

3. **HEALTH PROVIDER LEVEL**

|   |                         |                          |
|---|-------------------------|--------------------------|
| 1 | Specialist (Obs/Gyn)    | <input type="checkbox"/> |
| 2 | Medical Officer         | <input type="checkbox"/> |
| 3 | Nursing Officer/Midwife | <input type="checkbox"/> |
| 4 | Clinical Officer        | <input type="checkbox"/> |
| 5 | Other                   | <input type="checkbox"/> |

4. **HIGHEST QUALIFICATION ACHIEVED HEALTH PROVIDER LEVEL OF TRAINING**

|   |                   |                          |
|---|-------------------|--------------------------|
| 1 | Master's Degree   | <input type="checkbox"/> |
| 2 | Bachelor's Degree | <input type="checkbox"/> |
| 3 | Diploma           | <input type="checkbox"/> |
| 4 | Certificate       | <input type="checkbox"/> |
| 5 | Other             | <input type="checkbox"/> |

5. **HAVE YOU EVER ATTENDED A NEONATAL RESUSCITATION TRAINING?**

**YES..... (PROCEED TO QUESTION 6)**

**NO..... (PROCEED TO QUESTION 8)**

6. **PRIOR NR TRAINING ATTENDED (TICK ALL THAT APPLY)**

|   |                                                          |                          |
|---|----------------------------------------------------------|--------------------------|
| 1 | Helping Babies Breath (HBB)                              | <input type="checkbox"/> |
| 2 | Pediatric Advanced Life Support (PALS)                   | <input type="checkbox"/> |
| 3 | Emergency Triage Assessment and Treatment (ETAT/ETAT + ) | <input type="checkbox"/> |
| 4 | European Pediatric Life Support (EPLS)                   | <input type="checkbox"/> |
| 5 | Other (please specify)                                   | <input type="checkbox"/> |

7. **DURATION (MONTHS/YEARS) SINCE LAST NR TRAINING (INCLUDE FOR ALL TRAININGS ATTENDED)**

YEARS.....MONTHS.....

**SUPERVISION AND EXPERIENCE**

8. **HAVE YOU EVER HAD SUPPORT SUPERVISION IN NR IN THE WARD?**  
 YES ..... (PROCEED TO QUESTION 9)  
 NO..... (PROCEED TO QUESTION 11)

9. **TIME SINCE MOST RECENT STAFF SUPERVISION**

|   |               |  |
|---|---------------|--|
| 1 | < 6 months    |  |
| 2 | 6 - 12 months |  |
| 3 | > 12 months   |  |

10. **WHO DID THE SUPERVISION?**

|   |                     |  |
|---|---------------------|--|
| 1 | WARD IN – CHARGE    |  |
| 2 | UNIT MANAGER        |  |
| 3 | PUBLIC HEALTH NURSE |  |
| 4 | WARD MATE/COLLEAGUE |  |

11. **DURATION OF PRACTICE IN MATERNITY UNIT (MONTHS/YEARS):**

YEARS.....MONTHS.....

**SECTION B: CLINICAL PROTOCOLS AND GUIDELINES (Tick where applicable)**

*This section to be completed by the principal researcher or research assistant*

|   | JOB AIDS                                                                                              | YES | NO | REMARKS |
|---|-------------------------------------------------------------------------------------------------------|-----|----|---------|
| 1 | Are visual NR action plans/guidelines present at the resuscitation areas?                             |     |    |         |
| 2 | Do the healthcare workers refer to the NR guidelines/action plans during resuscitation?               |     |    |         |
| 3 | Are there flip charts for on job resuscitation training among healthcare providers in the labor unit? |     |    |         |

**SECTION C: BASIC NEONATAL RESUSCITATION EQUIPMENT CHECKLIST**

(To be filled in at the start of each resuscitation by the principal researcher or research assistant)

Instructions: Please tick in appropriate column to indicate if equipment is present or absent. The percentages will be calculated later.

**STATION:**    **LABOR WARD** \_\_\_\_    **MATERNITY THEATRE** \_\_\_\_    **NEWBORN UNIT** \_\_\_\_

| <b>PERMANENT ITEM</b> | <b>PRESENT</b> | <b>ABSENT</b> | <b>IN WORKING CONDITION</b> |
|-----------------------|----------------|---------------|-----------------------------|
| Warmer/ resuscitaire  |                |               |                             |
| Oxygen source         |                |               |                             |
| Suction machine       |                |               |                             |
| Ambu bag (500mls)     |                |               |                             |
| Clock                 |                |               |                             |

| <b>TEMPORARY ITEM</b>                                             | <b>PRESENT</b> | <b>ABSENT</b> | <b>REMARKS</b> |
|-------------------------------------------------------------------|----------------|---------------|----------------|
| Suction tube (6F,8F and 10F)                                      |                |               |                |
| Bulb suction device (penguin device, coloured bulb sucker)        |                |               |                |
| Face mask (preterm: size 0; term: size 1)                         |                |               |                |
| Mode of oxygen delivery (nasal catheter, nasal prongs, face mask) |                |               |                |
| Oxygen tubing                                                     |                |               |                |
| Clean dry towels (2)                                              |                |               |                |

**SECTION D: NEWBORN RESUSCITATION OBSERVATION CHECKLIST**

**Instructions:** Please tick to the choice that applies to resuscitation being observed

NO. OF OBSERVATIONS: ..... /5                      DATE.....

SHIFT: DAY.....                      EVENING.....                      ...                      NIGHT.....

STATION: LABOR WARD.....MATERNITY THEATRE.....NEWBORN UNIT.....

**RESUSCITATION PROCEDURE** (please tick yes/ no depending on observation made during resuscitation)

| PARAMETER                                                               | OBSERVATION                                                                                                | YES | NO |
|-------------------------------------------------------------------------|------------------------------------------------------------------------------------------------------------|-----|----|
| <b>PREPARATION FOR NEWBORN RESUSCITATION</b>                            |                                                                                                            |     |    |
| <b>A. PREPARATION FOR RESUSCITATION</b>                                 | 1. Prepares area for resuscitation                                                                         |     |    |
|                                                                         | 2. Checked availability of resuscitation equipment                                                         |     |    |
|                                                                         | 3. Check equipment: Ventilation bag, Full term mask, Preterm mask, Suction bulb, Warmth (warmer/clothing). |     |    |
|                                                                         | 4. Identify a helper                                                                                       |     |    |
| <b>Remarks</b>                                                          |                                                                                                            |     |    |
| <b>IMMEDIATELY AT BIRTH (FOR NEWBORN WHO DID NOT BREATHE AT BIRTH)</b>  |                                                                                                            |     |    |
| <b>B. DRYING/ STIMULATING</b>                                           | 1. Was the baby dried thoroughly? (by gently rubbing the back)                                             |     |    |
|                                                                         | 2. Was the wet cloth removed?                                                                              |     |    |
|                                                                         | 3. Was the baby kept warm?                                                                                 |     |    |
|                                                                         | Did the baby respond after drying/stimulating?                                                             |     |    |
|                                                                         | <b>OUTCOME</b>                                                                                             |     |    |
| <b>REMARKS</b>                                                          |                                                                                                            |     |    |
| <b>IF BABY NOT BREATHING AND/OR CRYING AFTER DRYING AND STIMULATION</b> |                                                                                                            |     |    |
| <b>C. CHECK/OPEN AIRWAY</b>                                             | 1. Looked into airway?                                                                                     |     |    |
|                                                                         | a. *Was meconium present?                                                                                  |     |    |
|                                                                         | b. If yes, was suctioning of airway done before drying/stimulating?                                        |     |    |

|                                                                                                 |                                                                                           |  |  |
|-------------------------------------------------------------------------------------------------|-------------------------------------------------------------------------------------------|--|--|
|                                                                                                 | *Was the child breathing before suctioning?                                               |  |  |
|                                                                                                 | 2. Was the baby's airway cleared with a suction bulb if unresponsive?                     |  |  |
|                                                                                                 | 3. Was the baby's head positioned in a neutral position?                                  |  |  |
|                                                                                                 | *Did the baby respond after clearing the airway?                                          |  |  |
|                                                                                                 | <b>OUTCOME</b>                                                                            |  |  |
|                                                                                                 | <b>REMARKS</b>                                                                            |  |  |
| <b>IF BABY DOES NOT RESPOND TO INITIAL RESUSCITATION EFFORTS (POOR OR NO BREATHING/GASPING)</b> |                                                                                           |  |  |
| <b>D. BAG AND MASK VENTILATION</b>                                                              | 1. Was bag – and – mask ventilation (BMV) initiated?                                      |  |  |
|                                                                                                 | *Time BMV initiated after birth (seconds)                                                 |  |  |
|                                                                                                 | 2. Was BMV initiated within the Golden minute (60s)?                                      |  |  |
|                                                                                                 | *Did the baby respond after this initial BMV?                                             |  |  |
|                                                                                                 | <b>IF BABY DID NOT RESPOND AFTER THE INITIAL BMV (ADVANCED BMV)</b>                       |  |  |
|                                                                                                 | 1. Did the healthcare provider call for help?                                             |  |  |
|                                                                                                 | 2. Was the correct mask size used during BMV? (Covers nose, mouth and makes a tight seal) |  |  |
|                                                                                                 | 3. Were there chest movements with each ventilation?                                      |  |  |
|                                                                                                 | 4. Was the ventilation rate within 30 – 50 per minute?                                    |  |  |
|                                                                                                 | 5. Was the baby's heart rate checked at 1 min?                                            |  |  |
|                                                                                                 | Did BMV continue if baby still unresponsive?                                              |  |  |
|                                                                                                 |                                                                                           |  |  |
|                                                                                                 | *Did the baby respond after this assisted BMV?                                            |  |  |
|                                                                                                 | <b>OUTCOME</b>                                                                            |  |  |
| <b>REMARKS</b>                                                                                  |                                                                                           |  |  |
| <b>IF POOR OR NO BREATHING/GASPING AFTER BMV</b>                                                |                                                                                           |  |  |
| <b>E. SUPPORT VENTILATION (IMPROVE</b>                                                          | 1. Was 1 effective breath for every 3 compressions for 1 min done?                        |  |  |
|                                                                                                 | 2. Did the baby require support breathing (supportive oxygen)?                            |  |  |

|                     |                                                      |  |  |
|---------------------|------------------------------------------------------|--|--|
| <b>VENTILATION)</b> | *Did the baby respond after the support ventilation? |  |  |
|                     | <b>OUTCOME</b>                                       |  |  |
|                     | <b>REMARKS</b>                                       |  |  |

NAME OF OBSERVER: .....

**SECTION E: NEONATAL PROGRESS MONITORING AND OUTCOME FORM**

Gestational Age (weeks):.....Birth weight (grams):.....

Mode of delivery:  SVD  Assisted delivery  Caesarean section  Breech

|  | <b>OUTCOME</b>                    | <b>PARAMETER</b>                                            | <b>YES</b> | <b>NO</b> |
|--|-----------------------------------|-------------------------------------------------------------|------------|-----------|
|  | <b>AT 1 MIN APGAR SCORE.....</b>  | Did The Baby Cry/Breathe After Drying/Stimulating at 1 Min? |            |           |
|  |                                   | Did The Baby Respond To Clearing Of Airway?                 |            |           |
|  |                                   | Others (specify)                                            |            |           |
|  | <b>AT 5 MIN APGAR SCORE.....</b>  | A - Skin color pink?                                        |            |           |
|  |                                   | G- Crying or active withdrawal?                             |            |           |
|  |                                   | A-Active motion?                                            |            |           |
|  |                                   | R- Good cry?                                                |            |           |
|  |                                   | Others (specify)                                            |            |           |
|  | <b>AT 10 MIN APGAR SCORE.....</b> | A - Skin color pink?                                        |            |           |
|  |                                   | G- Crying or active withdrawal?                             |            |           |
|  |                                   | A-Active motion?                                            |            |           |
|  |                                   | R- Good cry?                                                |            |           |
|  |                                   | Others (specify)                                            |            |           |
|  | <b>AT 1 HOUR</b>                  | Baby breathing well with mother                             |            |           |

|  |  |                                      |  |  |
|--|--|--------------------------------------|--|--|
|  |  | Baby alive on oxygen therapy         |  |  |
|  |  | Baby alive in special care area/unit |  |  |
|  |  | <b>Others (specify)</b>              |  |  |

## SECTION F: INFECTION PREVENTION PRACTICES

To be completed after completion of NR procedure by the principal researcher or research assistant.

|   | TASK                                                                                                                                                      | YES | NO |
|---|-----------------------------------------------------------------------------------------------------------------------------------------------------------|-----|----|
| 1 | CLEANING: Ventilation bag and mask device disassembled (suction device if possible) while still wearing gloves.                                           |     |    |
| 2 | DECONTAMINATION: all parts soaked in a 0.5% chlorine solution for 10 minutes.                                                                             |     |    |
| 3 | All parts washed with soap and water and rinsed carefully with clean water to remove all soap.                                                            |     |    |
| 4 | HLD: Parts boiled in water for 10 – 20 minutes OR soak in activated glutaraldehyde/cidex solution, then rinsed well with boiled water OR steam autoclave. |     |    |
| 5 | Dry completely and keep clean until next use                                                                                                              |     |    |
| 6 | REMARKS                                                                                                                                                   |     |    |
